# Supplementary material for: Early Earth microbial metallome: Insights from Cd, Ba, and Ni isotopes in stromatolites
Source: Research Square preprint supplement (doi:10.21203/rs.3.rs-2923288/v1), 2023-05-15
Supplement: Supplementary file 1 [file 2a1015dd425172d817564291.xlsx]

## Sheet: isotopes
name		δ13C(VPDB)	SE	δ18O(VPDB)	SE	CdID µg/g	δ112Cd	2SD	δ112Cdauth	Cdauth µg/g	Cddet µg/g	BaID µg/g	δ138Ba	2SD	Ni µg/g	δ60Ni	2SD
PG 6.1a-1	leach	1.96	0.08	-15.19	0.0888227							7.95	0.21328	0.04	88	0.1	0.03
PG 6.1a-2	leach	2.15	0.05	-15.57	0.0449534							3.21	0.17329	0.04	120	-0.01	0.03
PG 6.1a-3	leach	2.07	0.05	-15.81	0.071421	1.1772	0.185	0.038	0.185	1.17719	1.14007e-05	2.79	0.15996	0.04	17.1	-0.04	0.03
PG 6.1a-4	leach	1.93	0.07	-15.57	0.0474055	3.4412	0.058	0.027	0.058	3.44118	2.07156e-05	3.55	0.18662	0.04	27.8	0.06	0.02
PG 6.1b-1	leach	1.98	0.06	-15.49	0.0574701							3.41	0.18662	0.04	126	0.12	0.12
PG 6.1b-2	leach	2.01	0.11	-16.3	0.0658064							7.17	0.23994	0.04	505	-0.04	0.12
PG 6.1b-3	leach	1.97	0.07	-16.35	0.0824789	2.8896	0.059	0.034	0.059	2.88959	1.1431e-05	5.02	0.18662	0.04	75.6	0.01	0.04
PG 6.1b-4	leach	1.99	0.04	-15.1	0.0908152	4.1133	0.04	0.035	0.04	4.11328	1.69319e-05	3.61	0.15996	0.04	174	0.09	0.02
PG 6.1b-4#	leach					5.112	0.068	0.038	0.068	5.11198	1.69319e-05
6.1a-3	detritus					1.301	-0.015	0.04	-0.015001	1.29989	0.00110803
6.1a-4	detritus					2.7228	-0.015	0.038	-0.0150001	2.72189	0.000906197
6.1b-4	detritus					0.9028	-0.002	0.023	-0.00200318	0.899654	0.00314638
6.1a-1	bulk					4.207	0.223	0.045	0.223	4.20639	0.000606538
6.1a-2	bulk					1.743	0.343	0.081	0.343	1.74282	0.00017928
6.1b-1	bulk					2.833	0.096	0.068	0.096	2.83293	6.94558e-05
6.1b-1#	bulk					3.441	0.076	0.02	0.076	3.44085	0.000152127
JDo-1.1	leach	4.91	0.05	-4.52	0.07	0.55	0.3	0.066	0.3	0.549998		2.8	0.33325	0.04
JDo-1.2	leach					0.551	0.39	0.094	0.39	0.550998
JLs-1.1	leach	2.03	0.04	-4.5	0.07	0.1457	-0.21	0.012	-0.21	0.145699		48.71	0.02666	0.04
JLs-1.2	leach					0.1504	-0.2	0.07	-0.2	0.150399
CAL-S.3	leach	2.87	0.04	-4.27	0.06	0.2993	0.168	0.024	0.13	0.299298
CAL-S.4	leach					0.3019	0.13	0.04	0.13	0.301898

## Sheet: TE
name		Cd	Ni	Ba	Li	Sr	Zr	Mo	La	Ce	Pr	Nd	Sm	Eu	Gd	Tb	Dy	Y	Ho	Er	Tm	Yb	Lu	Sc	Ti	V	Cr	Cu	Zn	Y/Ho	Ce/Ce*	Pr/Pr*	Eu/Eu*Ba corr	PrN/YbN	SUMREE
6.1a-3-leach	leach	1.22	17.1	6.68	0.311	74.0	3.16	0.365	1.51	2.29	0.274	1.18	0.335	0.102	0.375	0.067	0.405	2.60	0.077	0.216	0.028	0.177	0.026	1.29	74.8	3.61	37.9	321	152	33.7	1.04	0.976	1.35	0.496	7.06
6.1a-4-leach	leach	3.22	27.8	21.2	0.585	120	5.74	0.405	2.30	3.56	0.437	1.87	0.536	0.161	0.588	0.104	0.639	4.18	0.122	0.340	0.045	0.289	0.040	2.35	123	6.96	29.9	238	1,573	34.2	1.01	0.990	1.30	0.483	11.0
6.1b-3-leach	leach	3.23	75.6	6.69	0.681	121	3.17	b.d.l.	2.75	3.94	0.471	1.98	0.552	0.165	0.608	0.109	0.668	4.29	0.127	0.343	0.044	0.275	0.039	2.21	103	5.86	23.6	320	263	33.7	1.01	0.990	1.34	0.548	12.1
6.1b-4-leach	leach	3.77	174	11.8	0.855	259	4.69	1.06	4.99	6.72	0.790	3.33	0.925	0.305	1.02	0.179	1.10	7.10	0.204	0.552	0.069	0.452	0.062	4.18	156	9.54	25.4	441	282	34.7	1.04	0.980	1.49	0.559	20.7
6.1a-3	detritus	1.72	73.3	40.1	7.73	92.6	307	16.4	1.37	1.31	0.130	0.433	0.058	0.036	0.075	0.016	0.060	0.196	0.013	0.036	0.005	0.028	0.004	0.330	39,719	50.6	73.9	791	462	15.3	0.973	1.01	1.29	1.47	3.58
6.1a-4	detritus	2.85	80.7	36.1	7.34	85.7	251	17.9	0.789	0.720	0.072	0.236	0.029	0.022	0.041	0.010	0.031	0.146	0.007	0.020	0.003	0.015	0.002	0.240	41,063	57.5	77.5	341	496	21.7	0.941	1.02	0.727	1.50	2.00
6.1b-3	detritus	4.53	183	55.2	10.6	98.7	498	17.5	3.60	3.20	0.275	0.864	0.101	0.053	0.142	0.021	0.096	0.254	0.021	0.063	0.008	0.045	0.008	0.440	56,897	64.7	102	433	448	12.3	1.06	0.947	1.24	1.93	8.50
6.1b-4	detritus	0.840	94.0	63.9	6.04	37.0	872	16.7	13.0	13.5	1.12	3.43	0.484	0.149	0.570	0.076	0.435	3.05	0.095	0.322	0.050	0.353	0.055	2.87	47,304	44.7	96.1	331	198	32.1	1.08	0.933	1.23	1.01	33.6
6.1a-1	bulk	4.90	88.0	29.2	6.71	93.8	168	18.1	0.362	0.252	0.028	0.097	0.015	0.020	0.022	0.008	0.022	0.126	0.005	0.014	0.002	0.011	0.002	0.240	36,561	52.3	72.2	964	589	26.7	0.900	1.05	1.40	0.844	0.858
6.1a-2	bulk	1.80	120	6.87	b.d.l.	96.8	49.7	12.9	0.196	0.110	0.015	0.056	0.010	0.011	0.013	0.007	0.017	0.106	0.004	0.011	0.002	0.008	0.001	0.450	23,882	26.0	32.9	1,153	255	29.4	0.807	1.11	2.25	0.598	0.459
6.1b-1	bulk	2.80	126	5.25	0.046	78.0	19.3	b.d.l.	0.186	0.128	0.011	0.039	0.006	0.008	0.009	0.006	0.012	0.094	0.003	0.008	0.002	0.007	0.001	0.090	24,629	39.1	49.2	556	391	37.5	1.22	0.894	overcorrected	0.527	0.418
6.1b-1#	bulk	3.03	141	14.2	0.007	92.8	42.2	b.d.l.	0.180	0.143	0.013	0.048	0.007	0.012	0.012	0.007	0.015	0.107	0.003	0.010	0.002	0.008	0.001	0.116	26,473	40.4	52.7	615	386	33.6	0.771	1.13	2.33	0.515	0.412
6.1b-2	bulk	5.21	505	11.8	0.068	199	134	27.8	0.619	0.414	0.045	0.157	0.023	0.018	0.034	0.014	0.034	0.238	0.007	0.023	0.004	0.018	0.003	0.370	50,377	68.4	76.5	1,013	386	34.0	0.917	1.04	1.72	0.811	1.41
PG 6.1a-1L	leach	1.46	949	22.1	1.78	194	0.116	0.024	1.73	3.47	0.431	1.79	0.463	0.147	0.585	0.091	0.528	3.19	0.104	0.275	0.037	0.233	0.034	4.91	5.35	10.3	28.8	39.5	78.4	30.6	0.965	1.01	1.36	0.591	9.91
PG 6.1a-2L	leach	0.119	1,364	20.9	1.17	25.4	0.013	0.032	0.419	0.818	0.099	0.424	0.108	0.034	0.127	0.020	0.113	0.628	0.022	0.059	0.007	0.047	0.007	3.15	2.59	3.95	27.8	5.06	7.03	28.5	1.02	0.984	1.06	0.673	2.30
PG 6.1a-3L	leach	1.22	111	32.9	2.51	245	0.299	0.200	3.28	8.37	0.639	2.46	0.572	0.196	0.699	0.104	0.591	3.62	0.116	0.318	0.042	0.266	0.037	10.5	11.4	14.4	46.1	63.3	79.7	31.2	1.46	0.815	1.49	0.767	17.7
PG 6.1a-4L	leach	0.102	1,337	16.3	0.878	29.7	0.016	0.001	0.427	0.894	0.110	0.465	0.124	0.040	0.150	0.023	0.136	0.747	0.026	0.069	0.009	0.055	0.007	2.71	2.26	2.97	25.9	17.7	6.47	28.7	0.993	0.999	1.23	0.639	2.54
PG 6.1a-5L	leach	3.42	887	24.2	1.66	206	0.115	0.024	1.86	3.89	0.496	2.10	0.541	0.187	0.679	0.109	0.640	3.78	0.128	0.339	0.044	0.282	0.041	4.79	6.83	9.91	32.4	70.8	141	29.5	0.958	1.01	1.48	0.562	11.3
PG 6.1a-6L	leach	1.71	228	14.5	0.964	250	0.122	0.018	1.72	3.79	0.495	2.18	0.615	0.190	0.738	0.124	0.718	6.62	0.142	0.386	0.051	0.327	0.047	4.42	5.43	5.93	28.6	75.9	105	46.6	0.976	1.00	1.36	0.483	11.5
PG 6.1a-7L	leach	0.644	1,724	13.6	0.895	168	0.049	0.010	1.39	2.95	0.374	1.62	0.445	0.146	0.562	0.089	0.521	3.14	0.105	0.288	0.038	0.237	0.035	3.75	3.49	3.82	25.8	29.6	35.1	29.9	0.988	0.998	1.43	0.504	8.79
PG 6.1a-8L	leach	0.878	292	19.5	1.35	280	0.129	0.022	2.12	6.17	0.529	2.30	0.611	0.207	0.728	0.116	0.670	6.03	0.134	0.360	0.047	0.292	0.043	4.59	7.38	9.58	28.0	61.3	73.4	45.0	1.47	0.824	1.50	0.579	14.3
PG 6.1a-9L	leach	1.24	1,781	15.8	1.29	284	0.071	0.029	2.30	6.62	0.558	2.42	0.626	0.215	0.756	0.123	0.692	6.29	0.137	0.371	0.048	0.300	0.044	4.39	5.01	5.20	27.0	43.1	165	45.9	1.48	0.819	1.52	0.594	15.2
PG 6.1a-10L	leach	9.00	933	19.8	1.27	165	0.058	0.027	1.30	2.97	0.393	1.73	0.482	0.146	0.594	0.099	0.593	5.46	0.118	0.322	0.044	0.275	0.040	4.27	4.82	8.79	27.8	24.0	283	46.3	0.960	1.01	1.28	0.456	9.11
PG 6.1b-1L	leach	0.479	772.73	19.830	1.215	52	0.173	0.040	0.73	1.449	0.179	0.742	0.192	0.063	0.244	0.039	0.225	1.29	0.045	0.115	0.016	0.097	0.014	3.057	3.2	4.17	30.95	8.10	16.1	28.8	0.970	1.01	1.28	0.589	4.15
PG 6.1b-2L	leach	2.51	482.9	13	1.02	278	0.10	0.025	2.0	5.9	0.50	2.1	0.56	0.179	0.69	0.110	0.66	5.75	0.129	0.353	0.046	0.285	0.042	4.4	4	5.5	28.8	28.85	93.8	44.5	1.44	0.830	1.422	0.56	13.6
PG 6.1b-3L	leach	1.04	2,737.4	29.8	1.71	107.4	0.050	0.023	0.982	2.18	0.298	1.296	0.375	0.113	0.451	0.076	0.450	2.59	0.091	0.238	0.030	0.189	0.028	5.93	4.57	6.201	44.9	14.67	25.68	28.4	0.92	1.028	1.20	0.50	6.80
PG 6.1b-4L	leach	4.05	259.88	12.81	0.962	293	0.054	0.024	1.95	4.12	0.528	2.34	0.652	0.198	0.795	0.130	0.778	6.98	0.153	0.417	0.052	0.325	0.046	4.90	4.85	5.584	30.3	25.461	114.950	45.6	0.997	0.99	1.34	0.52	12.5
PG 6.1b-5L	leach	4.98	628.721	17.842	0.847	47.498	0.014	0.016	0.546	1.211	0.159	0.696	0.202	0.060	0.243	0.041	0.236	1.362	0.046	0.125	0.016	0.103	0.014	3.037	2.694	3.556	26.225	27.239	30.464	29.609	0.963	1.008	1.166	0.493	3.698
JDo-1.1	leach	0.174	10.89	6.48	0.39	146.782	0.58	0.07	16.06	2.76	1.18	4.90	0.83	0.20	1.12	0.16	0.97	12.42	0.21	0.59	0.07	0.41	0.06	0.33	27.889	7.74	12.79	0.957	87	58.49	0.28	1.50	1.10	0.93	29.53
JDo-1.2	leach	0.174	10.89	6.48	0.39	146.782	0.58	0	16.06	2.76	1.18	4.90	0.83	0.20	1.12	0.16	0.97	12.42	0.21	0.59	0.07	0.41	0.06	0.33	27.889	7.74	12.79	0.957	86.724	58.49	0.28	1.50	1.10	0.93	29.53
JLs-1.1	leach	0.172	0.753	360	0.014	342	0.211	0.304	0.272	0.221	0.030	0.120	0.026	0.146	0.031	0.005	0.029	0.365	0.006	0.020	0.003	0.019	0.003	0.078	6.83	4.61	2.05	0.741	8.68	58.8	0.841	1.08	overcorrected	0.513	0.931
JLs-1.2	leach	0.172	0.753	360	0.014	342	0.211	0.304	0.272	0.221	0.030	0.120	0.026	0.146	0.031	0.005	0.029	0.365	0.006	0.020	0.003	0.019	0.003	0.078	6.83	4.61	2.05	0.741	8.68	58.8	0.841	1.08	overcorrected	0.513	0.931
CAL-S.3	leach	0.321	1.35	0.908	0.255	238	0.625	0.418	1.45	0.345	0.094	0.389	0.072	0.018	0.103	0.016	0.110	1.99	0.028	0.087	0.012	0.075	0.012	0.101	12.9	2.62	3.83	1.19	16.0	72.2	0.441	1.34	1.07	0.399	2.81
CAL-S.4	leach	0.321	1.35	0.908	0.255	238	0.625	0.418	1.45	0.345	0.094	0.389	0.072	0.018	0.103	0.016	0.110	1.99	0.028	0.087	0.012	0.075	0.012	0.101	12.9	2.62	3.83	1.19	16.0	72.2	0.441	1.34	1.07	0.399	2.81
GSR-6	bulk	0.059	16.0	148	7.78	1,598	1.10	0.061	17.5	34.6	2.72	10.3	1.93	0.426	2.03	0.242	1.14	9.47	0.208	0.550	0.069	0.429	0.062	17.7	831	35.3	28.2	6.27	24.5	45.5	1.39	0.834	0.991	2.03	72.2
GSR 12	leach	0.070	33.4	34.4	1.30	21.3	0.110	0.010	0.920	2.81	0.270	0.950	0.200	0.060	0.230	0.030	0.180	1.07	0.040	0.100	0.010	0.080	0.010	1.60	1.54	0.580	21.0	9.27	7.84	26.8	1.06	0.966	1.12	1.08	5.89
GSR 13	leach	0.010	6.52	2.49	0.680	112	0.170	0.010	2.14	4.19	0.500	1.87	0.360	0.080	0.380	0.050	0.300	1.63	0.060	0.180	0.020	0.150	0.020	2.65	1.56	0.210	22.3	0.080	0.190	27.2	0.906	1.05	1.13	1.06	10.3

## Sheet: ME
name		Mg (wt %)	Al (wt %)	P (µg/g)	S (µg/g)	Ca (wt %)	Mn (wt %)	Fe (wt %)
6.1a-3-leach	leach	2.85899	0.402568	not calibrated	64.96	16.3095	0.065787	0.307088
6.1a-4-leach	leach	4.92609	0.69993	not calibrated	193.98	22.5034	0.116138	0.551647
6.1b-3-leach	leach	4.58811	0.788084	not calibrated	79.59	20.9358	0.101556	0.490677
6.1b-4-leach	leach	21.1921	0.665918	not calibrated	106.93	27.1932	0.214781	1.05633
6.1a-3	detritus	-	0.869769	169.28	160.18	-	0.090573	0.521048
6.1a-4	detritus	-	0.515907	155.63	125.24	-	0.099802	0.598392
6.1b-3	detritus	-	0.907946	271.72	141.82	-	0.087255	0.554151
6.1b-4	detritus	-	1.05339	143.86	97.82	-	0.023555	0.201078
6.1a-1	bulk	3.82224	0.325419	169.01	224.37	20.1819	0.099951	0.618834
6.1a-2	bulk	3.3416	0.924864	7.68	113.71	19.6316	0.136863	0.364785
6.1b-1	bulk	3.86077	0.120795	185.54	54.15	16.2093	0.110066	0.490002
6.1b-1#	bulk	3.99698	0.183114	172.864	42.4868	19.1389	0.123483	0.50618
6.1b-2	bulk	6.42072	0.696121	554.59	219.51	38.5215	0.202879	0.724609
